# Supplementary material
Source: MDPI journal article supplement (https://www.mdpi.com/2311-5637/9/4/394)
Supplement: s1 [file s1]

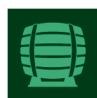

## Supplementary Material:

## Article

# Modelling of Catechin Extraction from Red Grape Solids under Conditions that Simulate Red Wine Fermentation

Judith Unterkofler <sup>1,2</sup>, David W. Jeffery <sup>1,2</sup>, Patrick C. Setford <sup>2,†</sup>, Jean Macintyre <sup>1,3</sup> and Richard A. Muhlack <sup>1,2,\*</sup>

<sup>1</sup> Australian Research Council Training Centre for Innovative Wine Production, The University of Adelaide, PMB 1, Glen Osmond, SA 5064, Australia; judith.unterkofler@adelaide.edu.au (J.U.); david.jeffery@adelaide.edu.au (D.W.J.); jean.macintyre@pernod-ricard.com (J.M.)

<sup>2</sup> School of Agriculture, Food and Wine and Waite Research Institute, The University of Adelaide, PMB 1, Glen Osmond, SA 5064, Australia; patrick.setford@oc.globalasahi.com

<sup>3</sup> Pernod Ricard Winemakers, 1914 Barossa Valley Way, Rowland Flat, SA 5352, Australia

\* Correspondence: richard.muhlack@adelaide.edu.au; Tel.: +61-8-8313-6771

† Current address: Asahi Beverages, 58 Queens Bridge St., Southbank, VIC 3006, Australia.

**Table S1.** Extracted Catechin amounts for Juice (266 g/L glucose; 0 % *v/v* ethanol) and Wine (0 g/L glucose; 14 % *v/v* ethanol) at low temperature (4.4 °C)

| Low Temperature (4.4 °C) |                                                 |                                               |
|--------------------------|-------------------------------------------------|-----------------------------------------------|
|                          | Juice (266 g/L glucose; 0 % <i>v/v</i> ethanol) | Wine (0 g/L glucose; 14 % <i>v/v</i> ethanol) |
| Time (h)                 | Catechin in mg/L                                | Catechin in mg/L                              |
| 1                        | 1.462                                           | 2.132                                         |
| 3                        | 2.297                                           | 3.912                                         |
| 6                        | 3.187                                           | 5.475                                         |
| 10                       | 3.758                                           | 6.474                                         |
| 16                       | 4.051                                           | 7.281                                         |
| 22                       | 4.564                                           | 8.227                                         |
| 28                       | 4.703                                           | 8.973                                         |
| 34                       | 4.801                                           | 9.010                                         |
| 41                       | 4.769                                           | 9.540                                         |
| 48                       | 5.033                                           | 9.427                                         |
| 69.5                     | 5.286                                           | 10.126                                        |

**Table S2.** Extracted Catechin amounts for the mid-ferment (133 g/L glucose; 7 % *v/v* ethanol) at medium temperature (12.2 °C)

| Medium Temperature (12.2 °C) |                                                       |
|------------------------------|-------------------------------------------------------|
|                              | Mid-Ferment (133 g/L glucose; 7 % <i>v/v</i> ethanol) |
| Time (h)                     | Catechin in mg/L                                      |
| 1                            | 2.374                                                 |
| 3                            | 3.743                                                 |
| 6                            | 4.913                                                 |
| 10                           | 5.924                                                 |
| 16                           | 7.031                                                 |
| 22                           | 7.661                                                 |
| 28                           | 8.303                                                 |
| 34                           | 8.495                                                 |
| 41                           | 8.714                                                 |

|      |       |
|------|-------|
| 48   | 8.613 |
| 69.5 | 8.849 |

**Table S3.** Extracted Catechin amounts for Juice (266 g/L glucose; 0 % *v/v* ethanol) and Wine (0 g/L glucose; 14 % *v/v* ethanol) at high temperature (23.1 °C)

| High Temperature (23.1 °C) |                                                 |                                               |
|----------------------------|-------------------------------------------------|-----------------------------------------------|
|                            | Juice (266 g/L glucose; 0 % <i>v/v</i> ethanol) | Wine (0 g/L glucose; 14 % <i>v/v</i> ethanol) |
| Time (hours)               | Catechin in mg/L                                | Catechin in mg/L                              |
| 1                          | 3.480                                           | 5.231                                         |
| 3                          | 4.820                                           | 9.029                                         |
| 6                          | 6.115                                           | 11.052                                        |
| 10                         | 7.025                                           | 11.734                                        |
| 16                         | 7.778                                           | 11.764                                        |
| 22                         | 8.597                                           | 11.643                                        |
| 28                         | 9.430                                           | 11.386                                        |
| 34                         | 9.820                                           | 11.091                                        |
| 41                         | 10.318                                          | 10.948                                        |
| 48                         | 10.419                                          | 10.618                                        |
| 69.5                       | -                                               | 10.302                                        |

**Table S4.** Extracted Catechin amounts for Juice (266 g/L glucose; 0 % *v/v* ethanol) and Wine (0 g/L glucose; 14 % *v/v* ethanol) at high temperature (23.1 °C).

|                      | R <sup>2</sup> at k | R <sup>2</sup> at k +10% | R <sup>2</sup> at k +30% | R <sup>2</sup> at k +50% |
|----------------------|---------------------|--------------------------|--------------------------|--------------------------|
| Sim-Wine 0°C         | 0.98                | 0.98                     | 0.97                     | 0.96                     |
| Sim-Juice 0°C        | 0.97                | 0.97                     | 0.96                     | 0.96                     |
| Sim-Mid-Ferment 10°C | 0.98                | 0.98                     | 0.97                     | 0.96                     |
| Sim-Wine 20°C        | 0.98                | 0.98                     | 0.97                     | 0.96                     |
| Sim-Juice 20°C       | 0.94                | 0.94                     | 0.94                     | 0.93                     |
